# Supplementary material for: Enhancing the energetic and magnetic stability of atomic hydrogen chemisorbed on graphene using (non)compensated B–N pairs
Source: Royal Society of Chemistry journal article supplement (doi:10.1039/d4cp00923a), 2024-01-01
Supplement: d4cp00923a1.pdf [file d4cp00923a1.pdf]

## Supporting Information

### Enhancing the energetic and magnetic stability of atomic hydrogen chemisorbed on graphene by (non)compensated B-N pairs

Zhengyan Chen<sup>a</sup>, Sanjun Wang<sup>b</sup>, Wen Xiong<sup>c</sup>, Fei Wang<sup>d,\*</sup>

<sup>a</sup> College of software, Henan Finance University, Zhengzhou 450046, China;

<sup>b</sup> College of Artificial Intelligence, Henan Finance University, Zhengzhou 450046, China;

<sup>c</sup> Chongqing Institute of Green and Intelligent Technology, Chinese Academy of Sciences, Chongqing 400714, China

<sup>d</sup> International Laboratory for Quantum Functional Materials of Henan, School of Physics and Microelectronics, Zhengzhou University, Zhengzhou 450001, China.

---

\* Corresponding author: [wfei@zzu.edu.cn](mailto:wfei@zzu.edu.cn)

Fig. S1

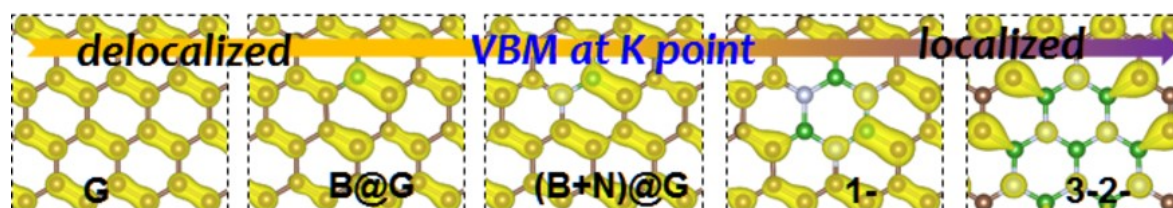

**Figure S1.** The changing trend of partial charge of VBM at Brillouin K point, including both compensated and noncompensated G, B@G, (B+N)@G, 1- and 3-2-. The isosurface is set to  $0.0016 \text{ e}/\text{\AA}^3$ .

Fig. S2

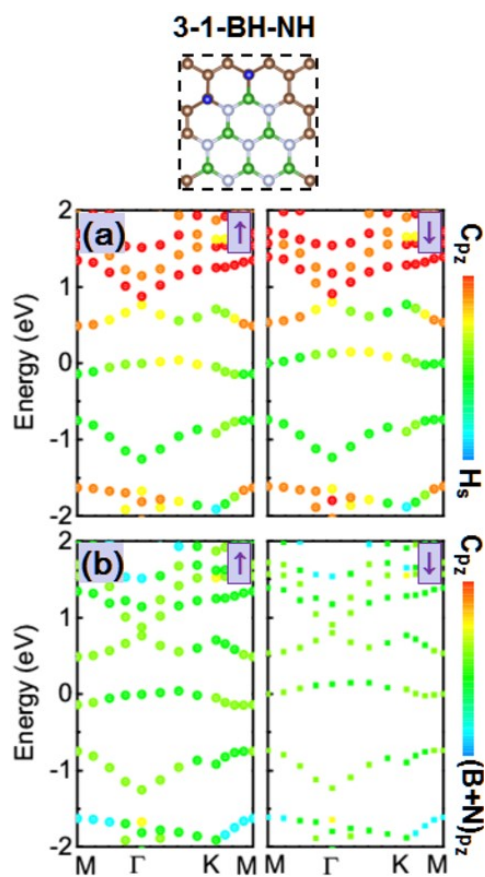

**Figure S2.** For noncompensated doping 3-1-BH-NH, (a) spin polarized projected bands for weights of  $Cp_z$  and adsorbate  $H_s$ , while (b) for weights of  $Cp_z$  and doped  $(B+N)p_z$ .

Fig. S3

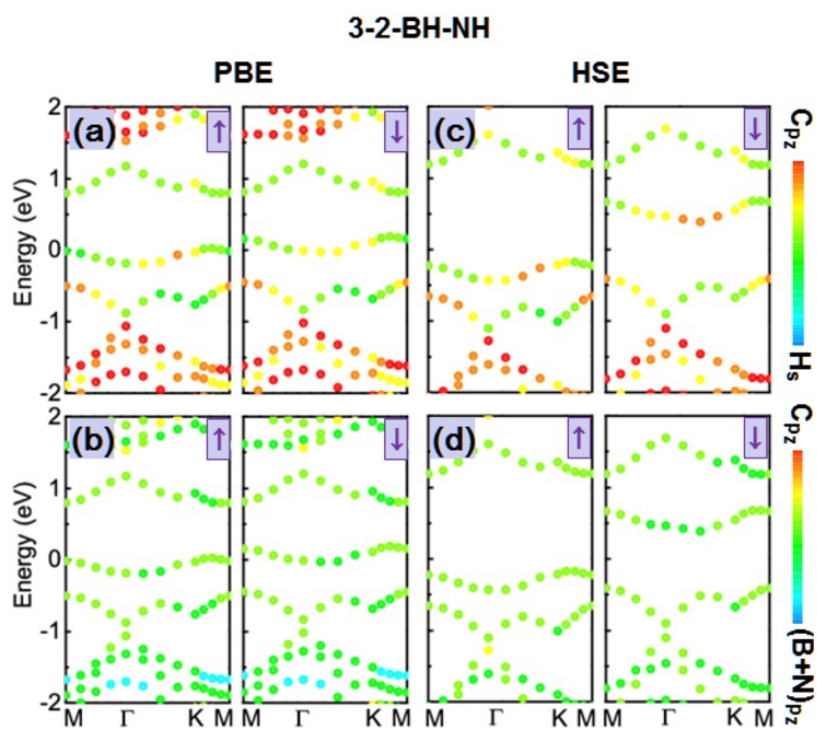

**Figure S3.** For 3-2-BH-NH, spin polarized projected bands calculated by PBE and HSE functionals. (a), (c) for weights of  $Cp_z$  and adsorbate  $H s$ , while (b), (d) for weights of  $Cp_z$  and doped  $(B+N) p_z$ .
